# Supplementary material for: Motion of methanol adsorbed in porous coordination polymer with paramagnetic metal ions
Source: Royal Society of Chemistry journal article supplement (doi:10.1039/b406883a), 2004-01-01
Supplement: b406883a.doc [file b406883a.doc]

**Definition of each states of porous coordination polymers.**

We define each porous coordination polymers with or without guests in the pore as follows.

**CPL-1** : host framework without guests.

**CPL-1 *n*H2O** : as synthesized compound which contains water molecules as guests.

**CPL**-**1 *n*CH3OH** : porous compound contains methanol molecules as guests.

**Simulated lineshapes of 2H NMR.**

The quadrupole coupling constant *Q*, the angle *β* between the principal axis of the quadrupolar tensor and that of the dipole tensor, the paramagnetic shift parameter *ν*P, and relative intensity for each component RI (*i* = 1~3) obtained from the simulation are collected in Table below.

**Table**  Fit parameters of the 2H NMR spectra of **CPL-1** ***n*CH3OH** at various temperatures

| *i* | *βi* /deg | *ν*P*i* /kHz |  | 293 K | | |  | 253 K | | |  | 223 K | | |  | 173 K | | |
| --- | --- | --- | --- | --- | --- | --- | --- | --- | --- | --- | --- | --- | --- | --- | --- | --- | --- | --- |
| *Qi* /kHz | RI*a* | *θ*/deg*b* | *Qi* /kHz | RI | *θ*/deg | *Qi* /kHz | RI | *θ*/deg | *Qi* /kHz | RI | *θ*/deg |
| 1 | 40 | 2.0 | 16.2 | 0.50 | 41.4 | 18.0 | 0.20 | 39.9 | 18.0 | 0.06 | 39.9 | 21.8 | 0.03 | 36.7 |
| 2 | 40 | 3.0 | 28.0 | 0.25 | 31.3 | 28.0 | 0.38 | 31.3 | 29.4 | 0.17 | 30.0 | 31.6 | 0.10 | 27.9 |
| 3 | 80 | 2.0 | 36.8 | 0.25 | 22.4 | 38.2 | 0.42 | 20.7 | 38.6 | 0.77 | 20.2 | 41.4 | 0.87 | 16.4 |

*a* The relative intensity of the spectral component at each temperature. *b* The angle for the rotation of CD3OH obtained by equation 1 with *Q*0 = 47 kHz.
